# Supplementary material for: In vivo high-content screening in zebrafish for developmental nephrotoxicity of approved drugs
Source: bioRxiv or medRxiv preprint supplement (doi:10.1101/2020.04.21.052688), 2020-04-21
Supplement: Supplementary file [file media-3.zip]

**Table 2. Additional compounds with adverse effects on pronephros development.**

| <b>E-level description</b>        | <b>ATC D-level description</b>                            | <b>ATC code D-level</b> |
|-----------------------------------|-----------------------------------------------------------|-------------------------|
| Omeprazole                        | Proton pump inhibitors                                    | A02BC                   |
| Dicyclomine hydrochloride         | Synthetic anticholinergics, quaternary ammonium compounds | A03AA                   |
| Warfarin                          | Vitamin K antagonists                                     | B01AA                   |
| <b>Proscillaridin A</b>           | <b>Scilla glycosides</b>                                  | <b>C01AB</b>            |
| <b>Amiodarone hydrochloride</b>   | <b>Antiarrhythmics, class III</b>                         | <b>C01BD</b>            |
| Metaraminol bitartrate            | Adrenergic and dopaminergic agents                        | C01CA                   |
| Midodrine hydrochloride           | Adrenergic and dopaminergic agents                        | C01CA                   |
| Canrenone                         | Aldosterone antagonists                                   | C03DA                   |
| Pentoxifylline                    | Purine derivatives                                        | C04AD                   |
| <b>Suloctidil</b>                 | <b>Other peripheral vasodilators</b>                      | <b>C04AX</b>            |
| <b>Diltiazem hydrochloride</b>    | <b>Phenylalkylamine derivates</b>                         | <b>C08DB</b>            |
| <b>Lidoflazine</b>                | <b>Other non-selective calcium channel blockers</b>       | <b>C08EX</b>            |
| Valsartan                         | Angiotensin II antagonists, plain                         | C09CA                   |
| <b>Irbesartan</b>                 | <b>Angiotensin II antagonists, plain</b>                  | <b>C09CA</b>            |
| <b>Ciclopirox ethanolamine</b>    | <b>Other antifungals for topical use</b>                  | <b>D01AE</b>            |
| <b>Isotretinoin</b>               | <b>Retinoids for treatment of acne</b>                    | <b>D10BA</b>            |
| <b>Norgestimate</b>               | <b>Progestogens and estrogens, fixed combinations</b>     | <b>G03AA</b>            |
| <b>Progesterone</b>               | <b>Pregnen (4) derivatives</b>                            | <b>G03DA</b>            |
| <b>Danazol</b>                    | <b>Antigonadotropins and similar agents</b>               | <b>G03XA</b>            |
| Gestrinone                        | Antigonadotropins and similar agents                      | G03XA                   |
| <b>Fludrocortisone acetate</b>    | <b>Mineralocorticoids</b>                                 | <b>H02AA</b>            |
| Methicillin sodium                | Beta-lactamase resistant penicillins                      | J01CF                   |
| Sulbactam                         | Beta-lactamase inhibitors                                 | J01CG                   |
| Tazobactam                        | Beta-lactamase inhibitors                                 | J01CG                   |
| Cefotaxime sodium salt            | Third-generation cephalosporins                           | J01DD                   |
| Troleandomycin                    | Macrolides                                                | J01FA                   |
| Streptomycin sulfate              | Streptomycins                                             | J01GA                   |
| <b>Nalidixic acid sodium salt</b> | <b>Other quinolones</b>                                   | <b>J01MB</b>            |
| Oxolinic acid                     | Other quinolones                                          | J01MB                   |
| <b>Amphotericin B</b>             | <b>Antibiotics</b>                                        | <b>J02AA</b>            |
| <b>Miconazole</b>                 | <b>Imidazole derivates</b>                                | <b>J02AB</b>            |
| Dapsone                           | Drugs for treatment of lepra                              | J04BA                   |
| Delavirdine                       | Non-nucleoside reverse transcriptase inhibitors           | J05AG                   |
| Raltitrexed                       | Folic acid analogues                                      | L01BA                   |
| <b>Carmofur</b>                   | <b>Pyrimidine analogues</b>                               | <b>L01BC</b>            |
| Epirubicin hydrochloride          | Anthracyclines and related substances                     | L01DB                   |
| Topotecan                         | Other antineoplastic agents                               | L01XX                   |
| <b>Flutamide</b>                  | <b>Anti-androgens</b>                                     | <b>L02BB</b>            |
| <b>Nilutamide</b>                 | <b>Anti-androgens</b>                                     | <b>L02BB</b>            |

|                                   |                                                                    |              |
|-----------------------------------|--------------------------------------------------------------------|--------------|
| Exemestane                        | Aromatase inhibitors                                               | L02BG        |
| <b>Leflunomide</b>                | <b>Selective immunosuppressants</b>                                | <b>L04AA</b> |
| Azathioprine                      | Other immunosuppressants                                           | L04AX        |
| Thalidomide                       | Other immunosuppressants                                           | L04AX        |
| <b>Phenylbutazone</b>             | <b>Butylpyrazolidines</b>                                          | <b>M01AA</b> |
| <b>Piroxicam</b>                  | <b>Oxicams</b>                                                     | <b>M01AC</b> |
| <b>Meloxicam</b>                  | <b>Oxicams</b>                                                     | <b>M01AC</b> |
| <b>Mefenamic acid</b>             | <b>Fenamates</b>                                                   | <b>M01AG</b> |
| Nimesulide                        | Other anti-inflammatory and antirheumatic agents, non-steroids     | M01AX        |
| Auranofin                         | Gold preparations                                                  | M01CB        |
| <b>Etofenamate</b>                | <b>Antiinflammatory preparations, non-steroids for topical use</b> | <b>M02AA</b> |
| <b>Felbinac</b>                   | <b>Antiinflammatory preparations, non-steroids for topical use</b> | <b>M02AA</b> |
| Cisatracurium besylate            | Other quaternary ammonium compounds                                | M03AC        |
| <b>Diflunisal</b>                 | <b>Salicylic acid and derivatives</b>                              | <b>N02BA</b> |
| Valproic acid                     | Fatty acid derivatives                                             | N03AG        |
| Entacapone                        | Other dopaminergic agents                                          | N04BX        |
| <b>Fluspirilen</b>                | <b>Diphenylbutylpiperidine derivatives</b>                         | <b>N05AG</b> |
| <b>Pimozide</b>                   | <b>Diphenylbutylpiperidine derivatives</b>                         | <b>N05AG</b> |
| Asenapine maleate                 | Diazepines, oxazepines and thiazepines                             | N05AH        |
| <b>Isocarboxazid</b>              | <b>Monoamine oxidase inhibitors, non-selective</b>                 | <b>N06AF</b> |
| <b>Disulfiram</b>                 | <b>Drugs used in alcohol dependence</b>                            | <b>N07BB</b> |
| Isoflupredone acetate             | n/a                                                                | n/a          |
| <b>Nocodazole</b>                 | <b>n/a</b>                                                         | <b>n/a</b>   |
| <b>Retinoic acid</b>              | <b>n/a</b>                                                         | <b>n/a</b>   |
| <b>GBR 12909 dihydrochloride</b>  | <b>n/a</b>                                                         | <b>n/a</b>   |
| Pregnenolone                      | n/a                                                                | n/a          |
| Parthenolide                      | n/a                                                                | n/a          |
| <b>Mevastatin</b>                 | <b>n/a</b>                                                         | <b>n/a</b>   |
| Tranilast                         | n/a                                                                | n/a          |
| Hexestrol                         | n/a                                                                | n/a          |
| <b>Cycloheximide</b>              | <b>n/a</b>                                                         | <b>n/a</b>   |
| Butylparaben                      | n/a                                                                | n/a          |
| <b>Methiazole</b>                 | <b>n/a</b>                                                         | <b>n/a</b>   |
| Homosalate                        | n/a                                                                | n/a          |
| <b>Clonixin Lysinate</b>          | <b>n/a</b>                                                         | <b>n/a</b>   |
| <b>Ethoxzolamide</b>              | <b>n/a</b>                                                         | <b>n/a</b>   |
| <b>Benzoxiquine</b>               | <b>n/a</b>                                                         | <b>n/a</b>   |
| <b>Clioquinol</b>                 | <b>Hydroxyquinoline derivatives</b>                                | <b>P01AA</b> |
| Diloxanide furoate                | Dichloracetamide derivatives                                       | P01AC        |
| <b>Halofantrine hydrochloride</b> | <b>Other antimalarials</b>                                         | <b>P01BX</b> |
| Ivermectin                        | Avermectines                                                       | P02CF        |
| Altrenogest                       | n/a                                                                | n/a          |

|                             |                                                 |              |
|-----------------------------|-------------------------------------------------|--------------|
| <b>Flunixin meglumine</b>   | <b>n/a</b>                                      | <b>n/a</b>   |
| <b>Oxibendazole</b>         | <b>n/a</b>                                      | <b>n/a</b>   |
| <b>Parbendazole</b>         | <b>n/a</b>                                      | <b>n/a</b>   |
| Flunisolide                 | Corticosteroids                                 | R01AD        |
| Mometasone furoate          | Corticosteroids                                 | R01AD        |
| <b>Salmeterol</b>           | <b>Selective beta-2-adrenoreceptor agonists</b> | <b>R03AC</b> |
| Beclomethasone dipropionate | Glucocorticoids                                 | R03BA        |
| Budesonide                  | Glucocorticoids                                 | R03BA        |
| Fluticasone propionate      | Glucocorticoids                                 | R03BA        |
| Meclozine dihydrochloride   | Piperazine derivatives                          | R06AE        |
| Astemizole                  | Other antihistamines for systemic use           | R06AX        |

Drugs with a strong effect on pronephros development as judged by quantitative analysis are highlighted in bold. Abbreviation: ATC, Anatomical Therapeutic Chemical Classification system.
