# Supplementary material for: In vivo high-content screening in zebrafish for developmental nephrotoxicity of approved drugs
Source: bioRxiv or medRxiv preprint supplement (doi:10.1101/2020.04.21.052688), 2020-04-21
Supplement: Supplementary file [file media-3.zip]

**Table S3. Main ATC D-level groups provoking renal developmental toxicity.**

| <b>ATC D-level description</b>                       | <b>ATC code D-level</b> | <b>Chemical name</b>                                                                                                                                                                                                                            |
|------------------------------------------------------|-------------------------|-------------------------------------------------------------------------------------------------------------------------------------------------------------------------------------------------------------------------------------------------|
| <b>Dihydropyridine derivatives</b>                   | C08CA                   | <b>Amlodipine</b><br><b>Felodipine</b><br><b>Isradipine</b><br>Nicardipine hydrochloride<br><b>Nifedipine</b><br>Nimodipine<br><b>Nitrendipine</b><br><b>Lacidipine</b><br><b>Nilvadipine</b><br><b>Cilnidipine</b><br>Benidipine hydrochloride |
| <b>HMG CoA reductase inhibitors</b>                  | C10AA                   | <b>Simvastatin</b><br><b>Lovastatin</b><br>Pravastatin<br><b>Fluvastatin sodium salt</b><br><b>Atorvastatin</b>                                                                                                                                 |
| <b>Fibrates</b>                                      | C10AB                   | <b>Clofibrate</b><br>Bezafibrate<br><b>Gemfibrozil</b><br><b>Fenofibrate</b><br>Ciprofibrate                                                                                                                                                    |
| <b>Imidazole and triazole derivatives</b>            | D01AC                   | <b>Sulconazole nitrate</b><br>Bifonazole<br><b>Oxiconazole nitrate</b><br><b>Sertaconazole nitrate</b>                                                                                                                                          |
| <b>Corticosteroids, moderately potent (group II)</b> | D07AB                   | <b>Flumethasone</b><br>Flumethasone pivalate<br><b>Desonide</b><br><b>Alclometasone dipropionate</b><br><b>Clocortolone pivalate</b>                                                                                                            |
| <b>Corticosteroids, potent (group III)</b>           | D07AC                   | <b>Fluocinonide</b><br><b>Fluocinolone acetonide</b><br>Flurandrenolide<br><b>Diflorasone diacetate</b><br>Amcinonide<br>Prednicarbate                                                                                                          |
| <b>Imidazole derivatives</b>                         | G01AF                   | Clotrimazole<br>Econazole nitrate<br><b>Isoconazole</b><br><b>Tioconazole</b><br><b>Butoconazole nitrate</b>                                                                                                                                    |

|                                                       |       |                                                                                                                                                                                                                                                            |
|-------------------------------------------------------|-------|------------------------------------------------------------------------------------------------------------------------------------------------------------------------------------------------------------------------------------------------------------|
| <b>Glucocorticoids</b>                                | H02AB | <b>Betamethasone</b><br><b>Dexamethasone acetate</b><br><b>Methylprednisolone, 6-alpha</b><br><b>Prednisolone</b><br>Prednisone<br><b>Triamcinolone</b><br><b>Hydrocortisone base</b><br><b>Cortisol acetate</b><br>Cortisone<br>Rimexolone<br>Deflazacort |
| <b>Acetic acid derivatives and related substances</b> | M01AB | <b>Indometacin</b><br>Sulindac<br>Tolmetin sodium salt dihydrate<br><b>Zomepirac sodium salt</b><br><b>Diclofenac sodium</b><br>Etodolac<br><b>Fentiazac</b><br>Acemetacin<br><b>Ketorolac tromethamine</b><br><b>Aceclofenac</b><br>Bufexamac             |
| <b>Propionic acid derivatives</b>                     | M01AE | <b>S-(+)-ibuprofen</b><br><b>Naproxen</b><br>Ketoprofen<br><b>Fenoprofen calcium salt dihydrate</b><br><b>Fenbufen</b><br>Suprofen<br><b>Flurbiprofen</b><br><b>Indoprofen</b><br>Tiaprofenic acid<br><b>Oxaprozin</b>                                     |
| <b>Benzimidazole derivatives</b>                      | P02CA | <b>Mebendazole</b><br>Tiabendazole<br><b>Albendazole</b><br>Flubendazole<br><b>Fenbendazole</b>                                                                                                                                                            |

---

Drugs affecting renal development as evaluated by quantitative measurements are highlighted in bold. Abbreviation: ATC, Anatomical Therapeutic Chemical Classification system.
